# Supplementary material
Source: PubMed Central journal article supplement (PMC2758038)
Supplement: NIHMS122161-supplement-S4.pdf [file NIHMS122161-supplement-S4.pdf]

T A C A G A G A A A T

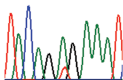

**WM35**

T A C A G A G A A A T

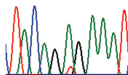

**WM793**

T A C A G T G A A A T

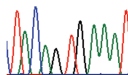

**MeWo**

T A C A G T G A A A T

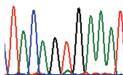

**HS294T**

T A C A G T G A A A T

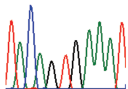

**FMC7C**

T A C A G T G A A A T

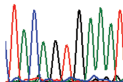

**FMC14C**
