# Supplementary material
Source: PubMed Central journal article supplement (PMC2758038)

DAPI

FITC

MERGE

anti-p65

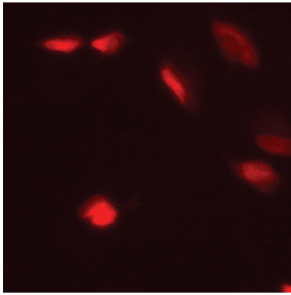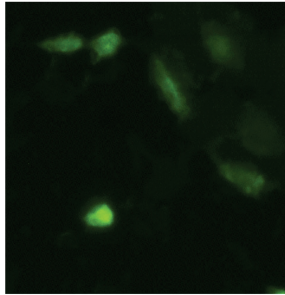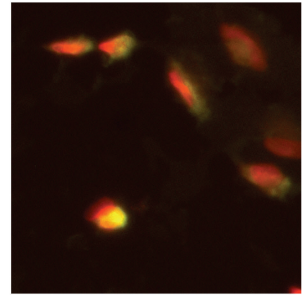

anti-p65 with  
competitor  
peptide

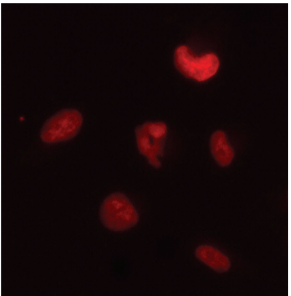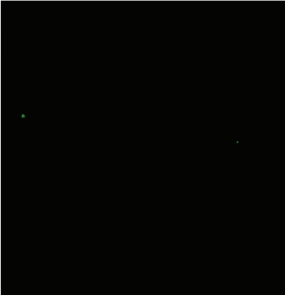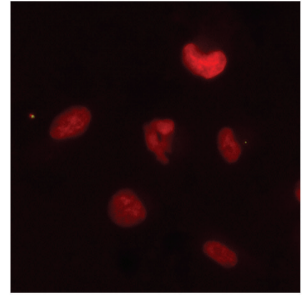

anti-p50

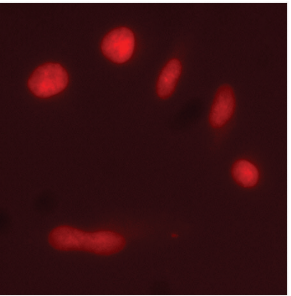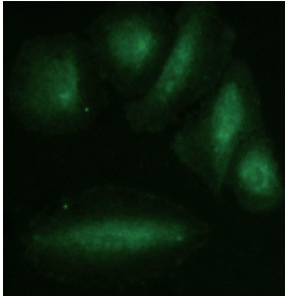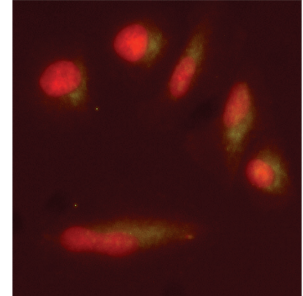

anti-p50 with  
competitor  
peptide

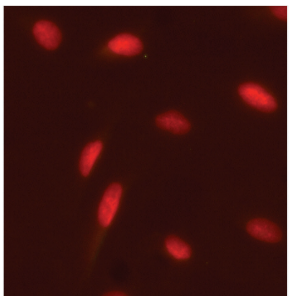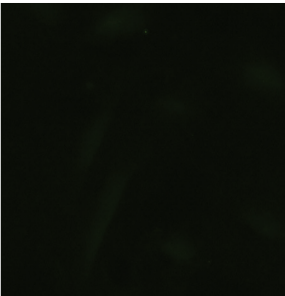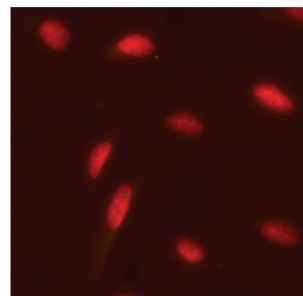

Supplement: NIHMS122161-supplement-S3.pdf [file NIHMS122161-supplement-S3.pdf]
